# Supplementary material for: Mn-ferrite nanoparticles as promising magnetic tags for radiofrequency inductive detection and quantification in lateral flow assays
Source: Royal Society of Chemistry journal article supplement (doi:10.1039/d4na00445k), 2024-01-01
Supplement: d4na00445k1.pdf [file d4na00445k1.pdf]

Electronic Supplementary Information from

# Mn-ferrite Nanoparticles as Promising Magnetic Tags for Radiofrequency Inductive Detection and Quantification in Lateral Flow Assays

Vanessa Pilati<sup>a,b,\*</sup>, María Salvador<sup>a,c</sup>, Leyre Bei Fraile<sup>a</sup>, José Luis Marqués-Fernández<sup>a</sup>, Franciscarlos Gomes da Silva<sup>b</sup>, Mona Fadel<sup>a</sup>, Ricardo López Antón<sup>d</sup>, María del Puerto Morales<sup>c</sup>, José Carlos Martínez-García<sup>a,e</sup>, Montserrat Rivas<sup>a,e</sup>

<sup>a</sup> Departamento de Física, Escuela Politécnica de Ingeniería (EPI), 33203, Universidad de Oviedo, Gijón, Spain.

<sup>b</sup> Complex Fluids Group, Instituto de Física & Faculdade UnB – Planaltina, Universidade de Brasília, 70910-900, Brasília, Brazil.

<sup>c</sup> Departamento de Nanociencia y Nanotecnología, Instituto de Ciencia de Materiales de Madrid (ICMM), 28049, Madrid, Spain.

<sup>d</sup> Instituto Regional de Investigación Científica Aplicada (IRICA) and Departamento de Física Aplicada, Universidad de Castilla-La Mancha, Ciudad Real, Spain

<sup>e</sup> Instituto Universitario de Tecnología Industrial de Asturias (IUTA), 33203, Gijón, Spain.

\* Corresponding author: pilativanessa@uniovi.es

## 1. Magnetization curves and LAS fitting parameters.

Table ESI-1 – Results from the law of approach to saturation fitting, where  $M_s$  is the saturation magnetization, fitting parameters are:  $a_1$ : (related to structural defects),  $a_2$ : (related to the magnetocrystalline and shape anisotropies) and  $a_3$ : (resulting from the high-field susceptibility).

| Sample name | $M_s$<br>(A·m <sup>2</sup> /kg) | $a_1$ (Oe) | $a_2$ (Oe <sup>2</sup> ) | $a_3$ (Oe <sup>-1</sup> ) | $R^2$  |
|-------------|---------------------------------|------------|--------------------------|---------------------------|--------|
| S1 (300 K)  | 77.5                            | 252.5      | $3.3 \times 10^4$        | $1.1 \times 10^{-5}$      | 0.9990 |
| S2 (300 K)  | 78.2                            | 262.6      | $4.0 \times 10^4$        | $3.6 \times 10^{-5}$      | 0.9998 |
| S1 (5 K)    | 115.6                           | 342.6      | $1.7 \times 10^5$        | $2.0 \times 10^{-5}$      | 0.9995 |
| S2 (5 K)    | 116.2                           | 409.3      | $4.0 \times 10^5$        | $2.3 \times 10^{-5}$      | 0.9996 |
